# Supplementary material for: Rice Bran Fermentation Using Lactiplantibacillus plantarum EM as a Starter and the Potential of the Fermented Rice Bran as a Functional Food
Source: MDPI journal article supplement (doi:10.3390/foods10050978), 2021-04-29
Supplement: s1 [file foods-1150651-supplementary.pdf › foods-1150651-supplementary.pdf]

**Table S1. Microorganisms used in this study.**

| Miroorganism                                         | Medium | Culture condition  |
|------------------------------------------------------|--------|--------------------|
| <b>LAB</b>                                           |        |                    |
| <i>Lactobacillus plantarum</i> EM                    | MRS    | 30°C or 37°C, 24 h |
| <i>Weissella koreensis</i> DB1                       | MRS    | 30°C, 24 h         |
| <i>Lactobacillus plantarum</i> ATCC 14917            | MRS    | 30°C, 24 h         |
| <b>Bacteria</b>                                      |        |                    |
| <i>Bacillus cereus</i> ATCC 14579                    | LB     | 37°C, 24 h         |
| <i>Escherichia coli</i> O157:H7 ATCC 43895           | LB     | 37°C, 24 h         |
| <i>Pseudomonas aeruginosa</i> ATCC 27853             | LB     | 37°C, 24 h         |
| <i>Salmonella enterica</i> serovar. Typhi ATCC 14028 | LB     | 37°C, 24 h         |
| <b>Molds</b>                                         |        |                    |
| <i>Aspergillus flavus</i> ATCC 22546                 | MEA    | 30°C, 48 h         |
| <i>Aspergillus fumigatus</i> ATCC 96918              | MEA    | 30°C, 48 h         |
| <i>Penicillium roqueforti</i> ATCC 10110             | PDA    | 25°C, 48 h         |
| <i>Penicillium expansum</i> ATCC 7861                | PDA    | 25°C, 48 h         |

MEA; malt extract agar, PDA; potato dextrose agar, LB: Luria-Bertani, MRS: de Man Rogosa Sharpe

**Table S2. Rice bran slurry supplemented with different nutrients.**

| <b>Rice bran<br/>slurry</b> | <b>Supplemented nutrients and their concentrations used</b>                                                                                                                                                               |
|-----------------------------|---------------------------------------------------------------------------------------------------------------------------------------------------------------------------------------------------------------------------|
| Basic slurry                | + None                                                                                                                                                                                                                    |
| : 20 % rice                 | + Carbon source: 1 and 3% (w/v) of glucose, maltose, sucrose, or fructose                                                                                                                                                 |
| bran powder                 | + Nitrogen source: 1, 3, and 5% (w/v) of peptone, soytone, beef extract, or yeast extract                                                                                                                                 |
| distilled in                | + Complex compound source: 1, 2, 3, 4, and 5% (w/v) of corn steep liquor (CSL)                                                                                                                                            |
| water                       | + Combined nutrients: 1% of glucose + 3% beef extract,<br>1% of glucose + 3% CSL,<br>1% of glucose + 3% of beef extract + 3% of CSL<br>3% of beef extract + 3 % CSL, or<br>1% of glucose + 3% of beef extract + 3% of CSL |

**Table S3. Phytase activity of *L. plantarum* EM.**

| <b>LAB strains</b>                        | <b>Diameter of clear zone (mm)</b> |
|-------------------------------------------|------------------------------------|
| <i>Lactobacillus plantarum</i> EM         | 18.14±0.10 <sup>a</sup>            |
| <i>Lactobacillus plantarum</i> ATCC 14917 | 12.51±0.14 <sup>b</sup>            |
| <i>Weissella koreensis</i> DB1            | 9.01±0.02 <sup>c</sup>             |

Means ±SDs with different letters were significantly different (p<0.05) by Duncan's multiple range test.
